# Supplementary material for: Genetic characterization of dengue virus serotype 1 circulating in Reunion Island, 2019–2021, and the Seychelles, 2015–2016
Source: Springer Nature journal article supplement (doi:10.1186/s12879-023-08125-y), 2023-05-05

PCR 1

PCR 2

D1: 1581/PCR1  
D2: 1914/PCR1  
D3: 1583/PCR1  
D4: 1615/PCR1  
D5: P409/PCR1  
Negative Control  
Marker

D1: 1581/PCR2  
D2: 1914/PCR2  
D3: 1583/PCR2  
D4: 1615/PCR2  
D5: P409/PCR2  
Negative Control  
Marker

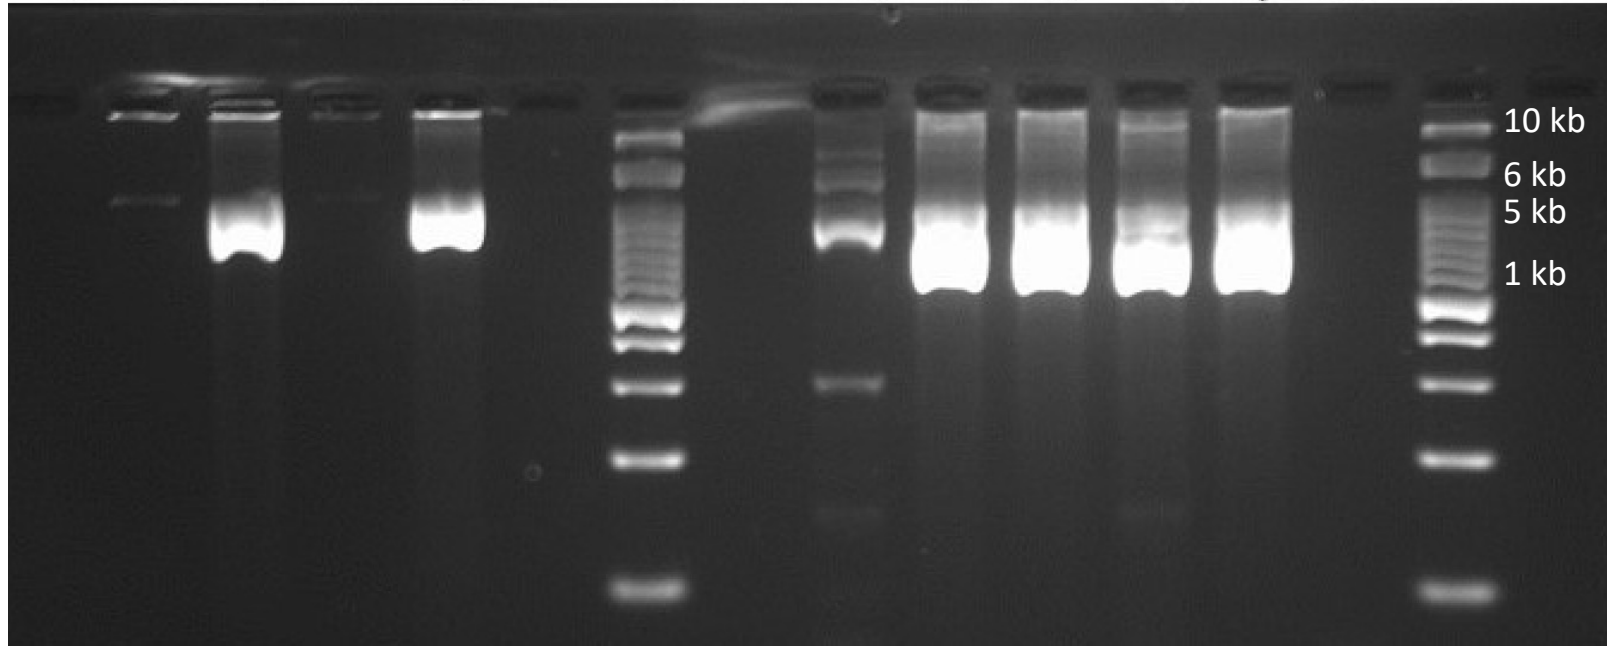

Supplement: MOESM3 [file 25324304]
